# Supplementary material for: Seasonal phoresy as an overwintering strategy of a phytophagous mite
Source: PubMed Central journal article supplement (PMC4858688; doi:10.1038/srep25483), 2016-05-06
Supplement: srep25483-s1.pdf [file srep25483-s1.pdf]

## Seasonal phoresy as an overwintering strategy of a phytophagous mite

Sai Liu, Jianling Li, Kun Guo, Haili Qiao, Rong Xu, Jianmin Chen, Changqing Xu\*,

Jun Chen\*

### **Figure S1**

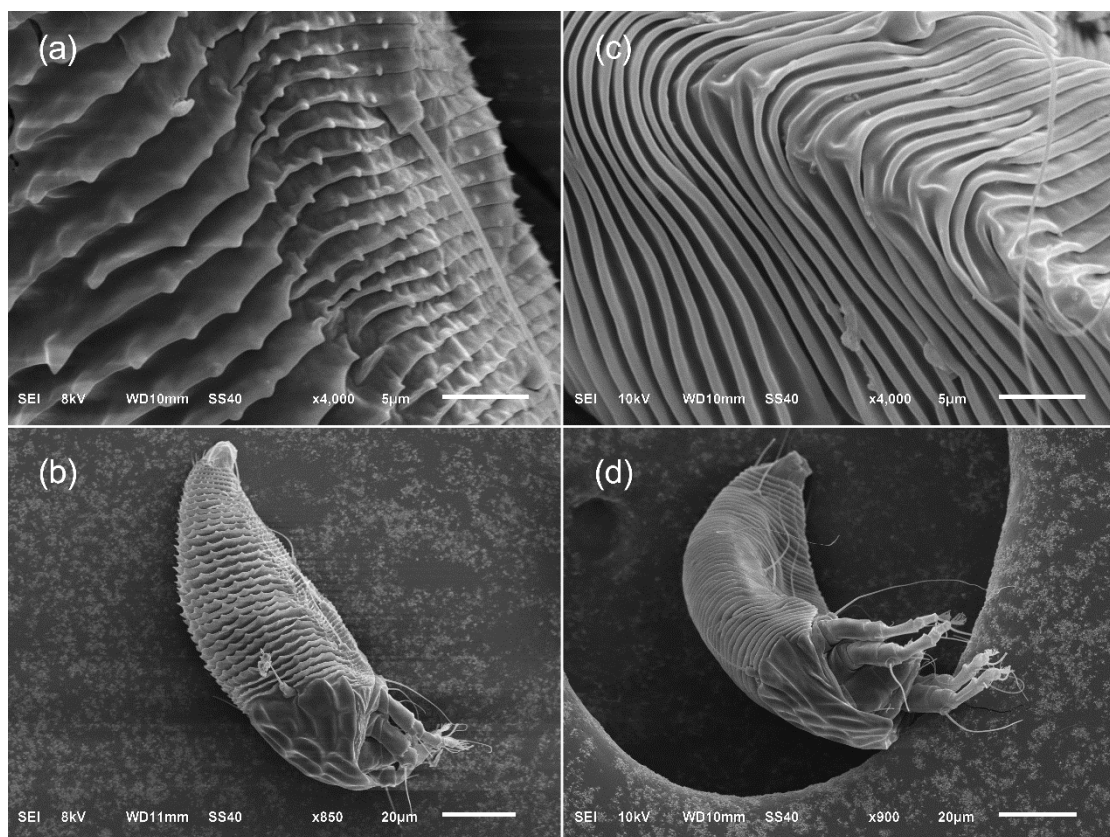

**Figure S1.** The microtubercles and slide views of the protogynes of *A. lycii* (a) (b) in summer and the deutogynes (c) (d) in winter. The deutogynes have significantly reduced microtuberculation.
